# Supplementary material for: Novel self-assembled nanogels of PEG-grafted poly HPMA with bis(α-cyclodextrin) containing disulfide linkage: synthesis, bio-disintegration, and in vivo biocompatibility
Source: Royal Society of Chemistry journal article supplement (doi:10.1039/d1nj05974b), 2022-01-01
Supplement: d1nj05974b1.pdf [file d1nj05974b1.pdf]

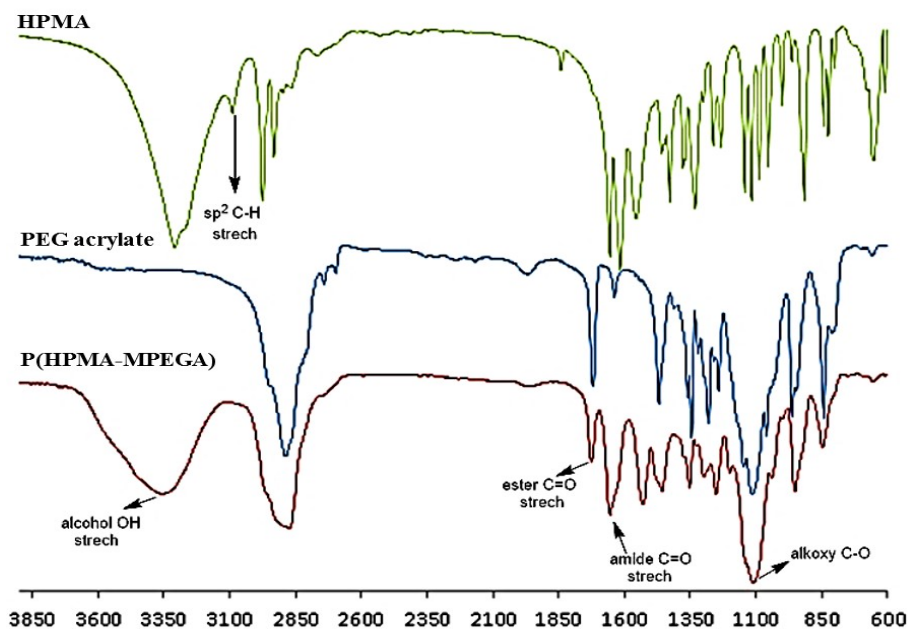

Figure S1. FT-IR spectrum of HPMA, PEG acrylate and P(HPMA-MPEGA)

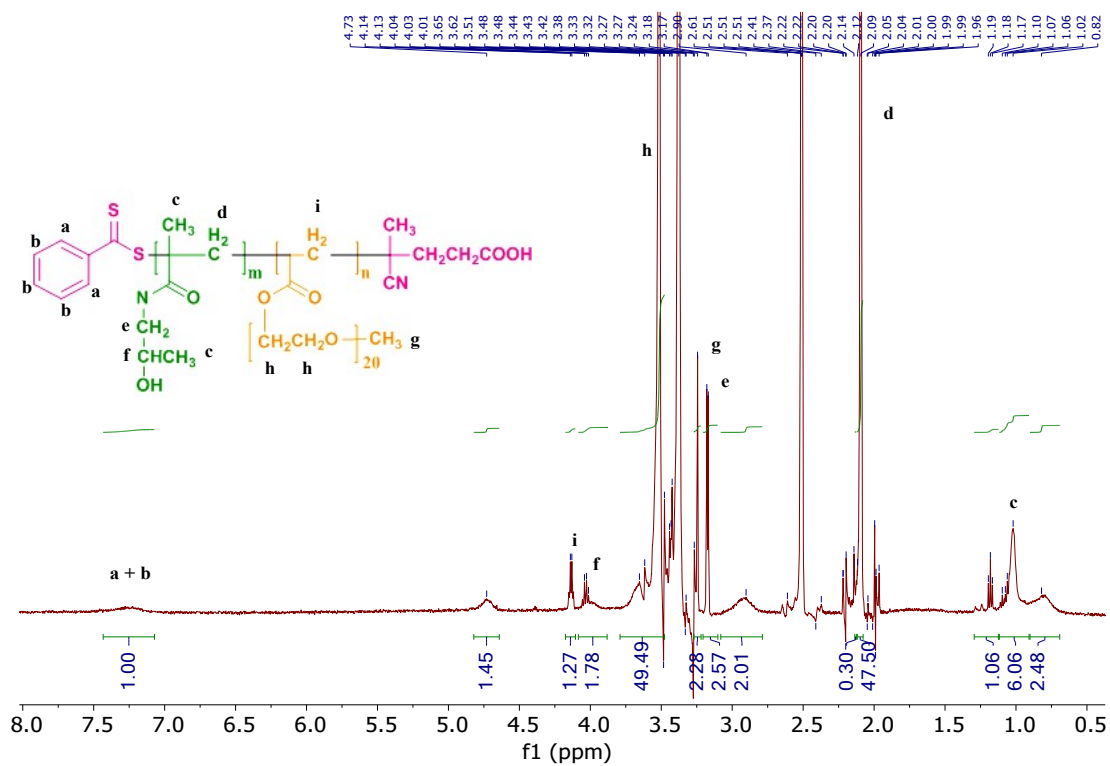

Figure S2.  $^1\text{H-NMR}$  spectrum of P(HPMA-MPEGA) in  $(d_6)\text{DMSO}$

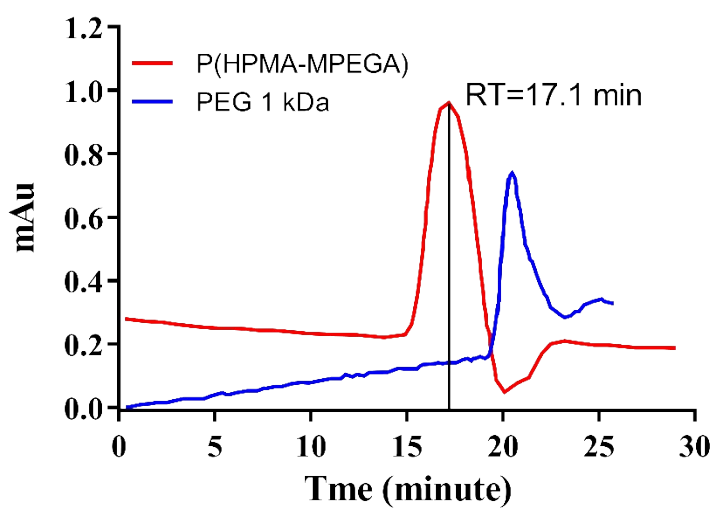

Figure S3. Size exclusion chromatography curve of P(HPMA-MPEGA) and PEG (1 kDa)

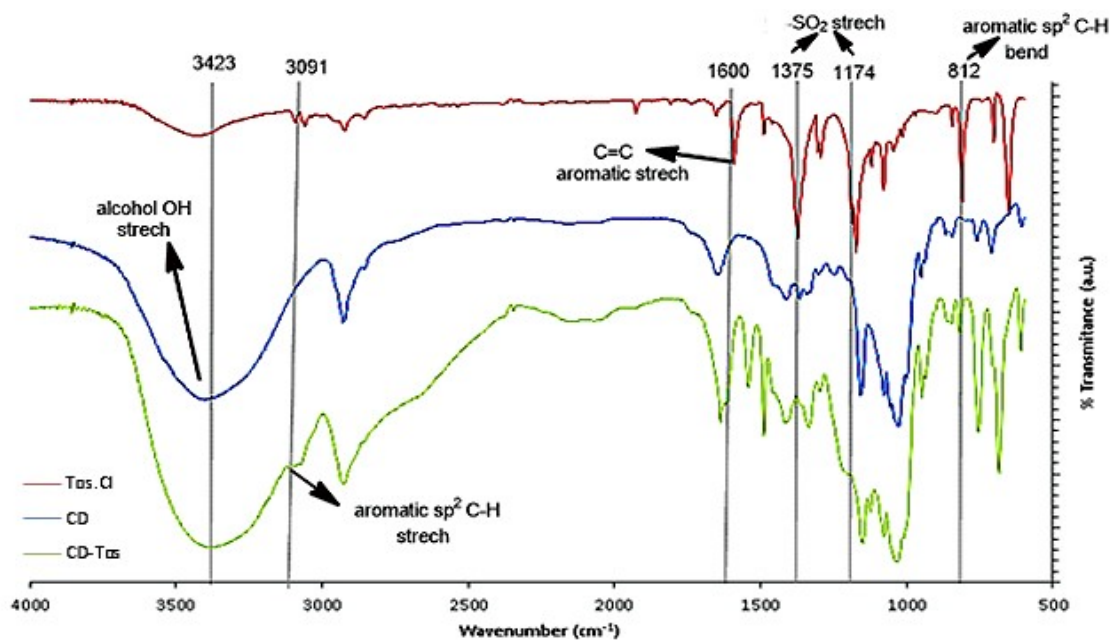

Figure S4. FT-IR spectra of Tos.Cl, CD and CD-Tos

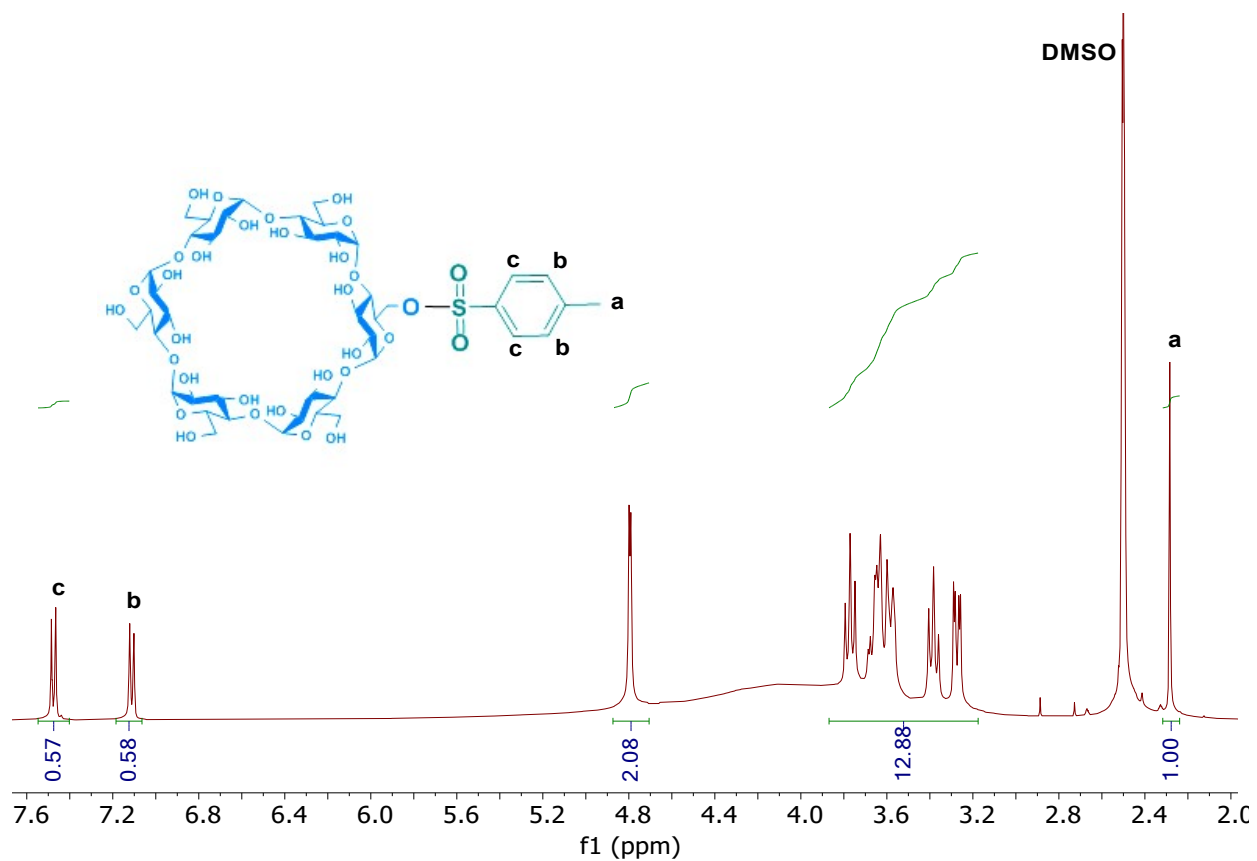

Figure S5.  $^1\text{H-NMR}$  spectrum of CD-Tos in  $(d_6)\text{DMSO}$

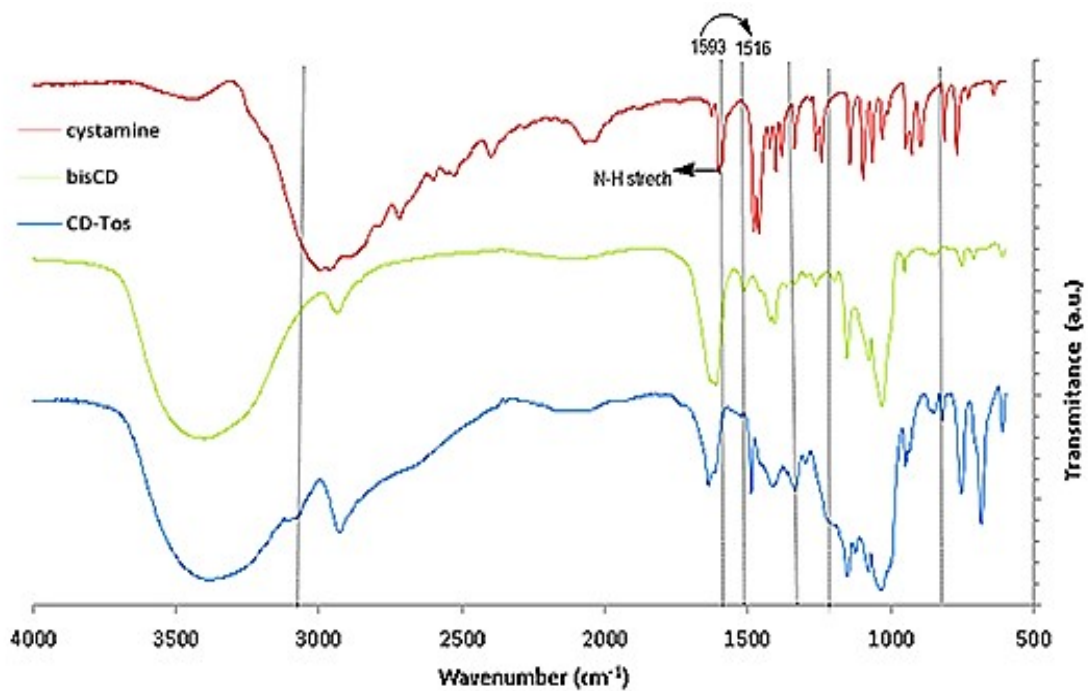

Figure S6. FT-IR spectra of cystamine, CD-Tos and bisCD

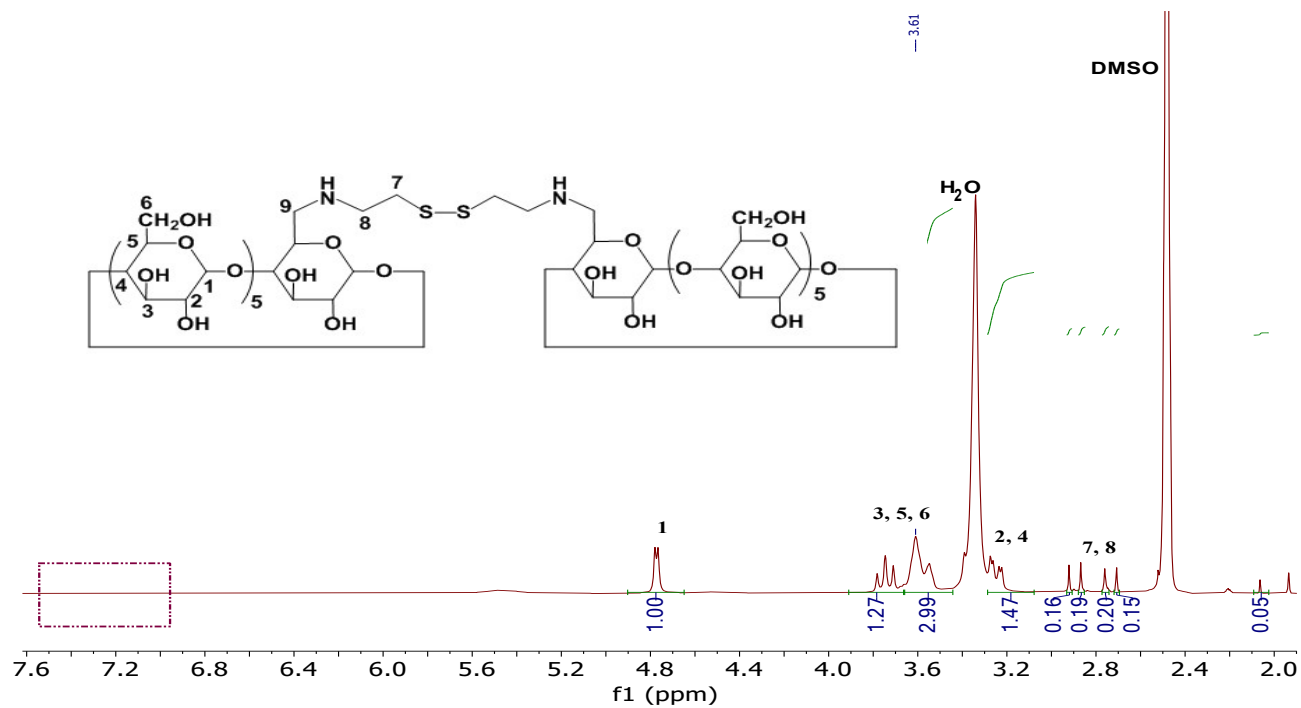

Figure S7.  $^1\text{H-NMR}$  spectrum of bisCD in  $(d_6)\text{DMSO}$

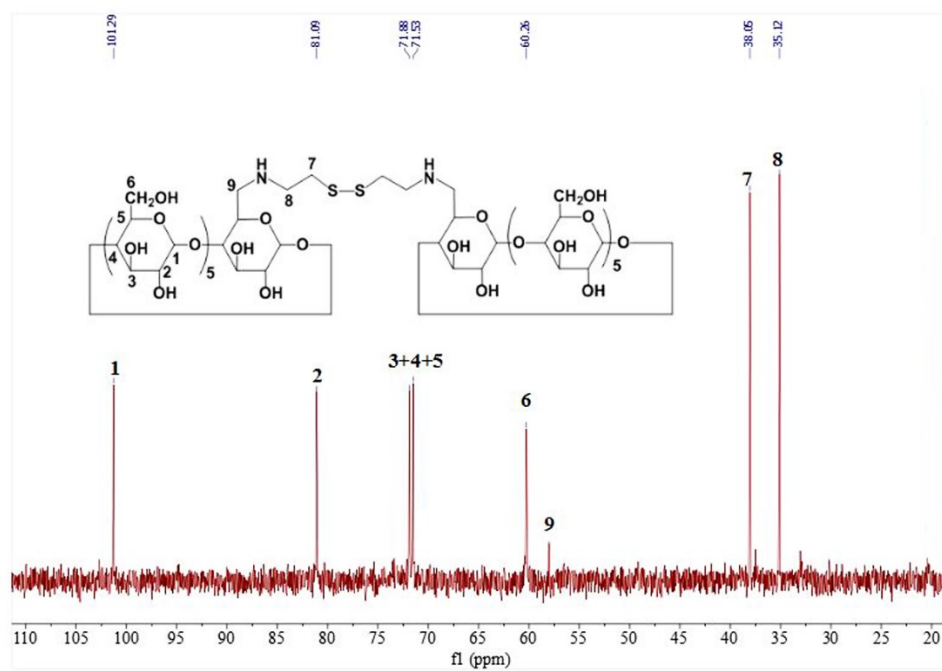

Figure S8.  $^{13}\text{C-NMR}$  spectrum of bisCD in  $\text{D}_2\text{O}$ .

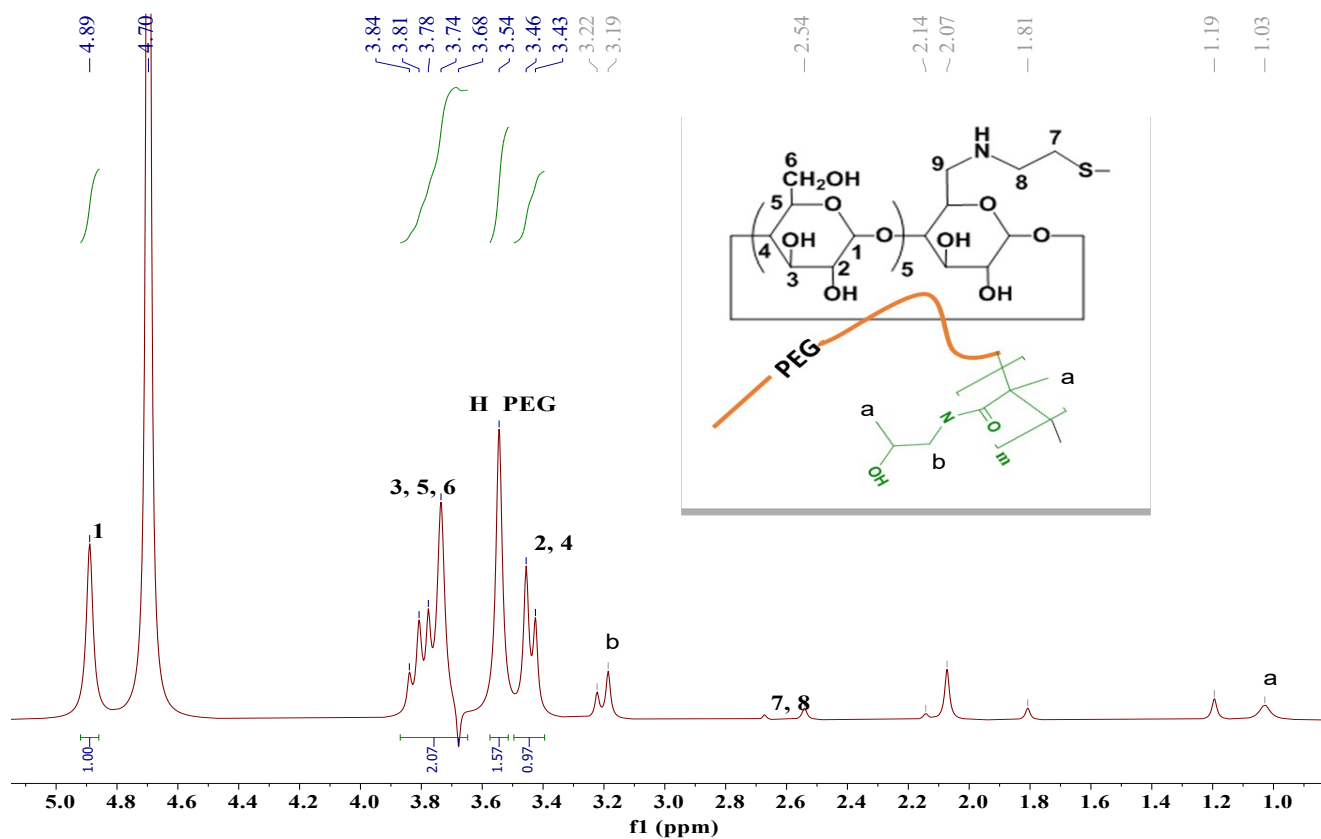

Figure S9.  $^1\text{H-NMR}$  spectrum of bisCD nanogel in  $\text{D}_2\text{O}$ .

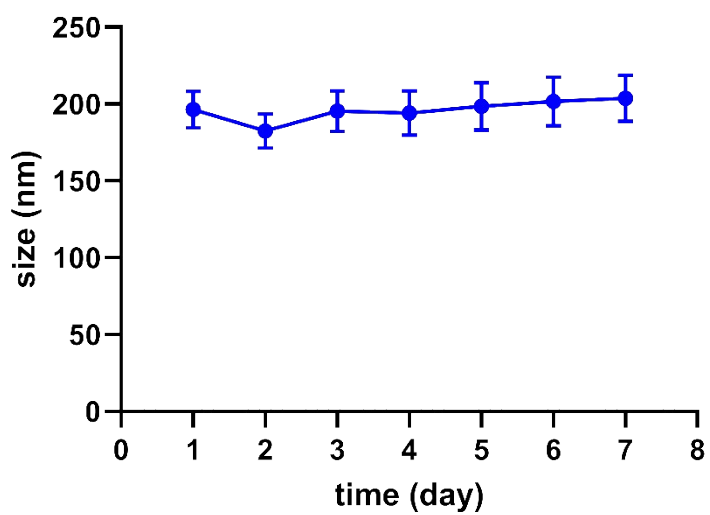

Figure S10. bisCD nanogel particle size stability over time
